# Supplementary material for: Enhanced Pentostatin Production in Actinomadura sp. by Combining ARTP Mutagenesis, Ribosome Engineering and Subsequent Fermentation Optimization
Source: MDPI journal article supplement (doi:10.3390/fermentation9040398), 2023-04-20
Supplement: s1 [file s1]

## Supplementary Materials

### **Enhanced Pentostatin Production in *Actinomadura* sp. by Combining ARTP Mutagenesis, Ribosome Engineering and Subsequent Fermentation Optimization**

Hongyu Zhang<sup>1</sup>, Deguang Zhang<sup>1</sup>, Ran Liu<sup>1</sup>, Tingting Lou<sup>2,\*</sup>, Ruyue Tan<sup>1</sup> and Suying Wang<sup>1,\*</sup>

<sup>1</sup>. Tianjin Key Laboratory of Food Biotechnology, College of Biotechnology and Food Science, Tianjin University of Commerce, Tianjin 300134, China; zhanghongyu@tjcu.edu.cn (H.Z.); zdg1663754179@126.com (D.Z.); lr12340831@126.com (R.L.); z\_pillar@126.com (R.T.)

<sup>2</sup>. Animal, Plant and Foodstuffs Inspection Center of Tianjin Customs, Tianjin 300461, China;

\*Correspondence: Tingting Lou; Suying Wang

E-mail: loutingtingucas@126.com (T.L.); wsying@tjcu.edu.cn (S.W.)

## ***Contents***

*Table S1. RT-qPCR analysis of the transcription levels of different genes in Actinomadura sp. S-15 compared with those in Actinomadura sp. ATCC 39365 on the 5th day.*

*Table S2. RT-qPCR analysis of the transcription levels of different genes in Actinomadura sp. S-15 compared with those in Actinomadura sp. ATCC 39365 on the 8th day.*

*Table S3. Effect of different carbon sources on pentostatin production and biomass in Actinomadura sp. S-15.*

*Table S4. Effect of different maltitol concentrations on pentostatin production and biomass in Actinomadura sp. S-15.*

*Table S5 Effect of the initial pH of the fermentation medium on pentostatin production and biomass of Actinomadura sp. S-15*

*Table S6 Effect of the seed age on pentostatin production and biomass of Actinomadura sp. S-15.*

*Table S7 Effect of the culture time on pentostatin production and biomass of Actinomadura sp. S-15.*

Table S1. RT-qPCR analysis of the transcription levels of different genes in *Actinomadura* sp. S-15 compared with those in *Actinomadura* sp. ATCC 39365 on the 5th day.

| <b>Gene</b> | $\Delta\Delta\text{Ct}_1$ | $\Delta\Delta\text{Ct}_2$ | $\Delta\Delta\text{Ct}_3$ | $\bar{\Delta\Delta\text{Ct}}$ | $2^{-\bar{\Delta\Delta\text{Ct}}} \pm \text{SD}$ |
|-------------|---------------------------|---------------------------|---------------------------|-------------------------------|--------------------------------------------------|
| <i>AdeA</i> | 0.6305                    | 0.6197                    | 0.6386                    | 0.6296                        | 0.6464 $\pm$ 0.0043                              |
| <i>AdeB</i> | 0.0299                    | 0.0401                    | 0.0443                    | 0.0381                        | 0.9740 $\pm$ 0.0050                              |
| <i>AdeC</i> | -0.1699                   | -0.1803                   | -0.1862                   | -0.1788                       | 1.1320 $\pm$ 0.0065                              |
| <i>AdeK</i> | 0.0093                    | 0.0203                    | 0.0049                    | 0.0115                        | 0.9921 $\pm$ 0.0055                              |
| <i>AdeM</i> | -0.4698                   | -0.4815                   | -0.4701                   | -0.4738                       | 1.3888 $\pm$ 0.0064                              |

Table S2. RT-qPCR analysis of the transcription levels of different genes in *Actinomadura* sp. S-15 compared with those in *Actinomadura* sp. ATCC 39365 on the 8th day.

| <b>Gene</b> | $\Delta\Delta\text{Ct}_1$ | $\Delta\Delta\text{Ct}_2$ | $\Delta\Delta\text{Ct}_3$ | $\bar{\Delta\Delta\text{Ct}}$ | $2^{-\bar{\Delta\Delta\text{Ct}}} \pm \text{SD}$ |
|-------------|---------------------------|---------------------------|---------------------------|-------------------------------|--------------------------------------------------|
| <i>AdeA</i> | -1.5693                   | -1.5802                   | -1.5647                   | -1.5714                       | 2.9719 $\pm$ 0.0164                              |
| <i>AdeB</i> | -0.6803                   | -0.6698                   | -0.6854                   | -0.6785                       | 1.6005 $\pm$ 0.008                               |
| <i>AdeC</i> | -0.5310                   | -0.5192                   | -0.5158                   | -0.5220                       | 1.4360 $\pm$ 0.0079                              |

---

|             |         |         |         |         |               |
|-------------|---------|---------|---------|---------|---------------|
| <i>AdeK</i> | -0.1804 | -0.1699 | -0.1864 | -0.1789 | 1.1320±0.0065 |
| <i>AdeM</i> | -1.9289 | -1.9405 | -1.9350 | -1.9348 | 3.8233±0.0154 |

---

Table S3. Effect of different carbon sources on pentostatin production and biomass in *Actinomadura* sp. S-15.

| Carbon sources (4 g/L) | Pentostatin Production (g/L) |                |                |           |        | Biomass (DCW) (mg/mL) |                |                |           |        |
|------------------------|------------------------------|----------------|----------------|-----------|--------|-----------------------|----------------|----------------|-----------|--------|
|                        | X <sub>1</sub>               | X <sub>2</sub> | X <sub>3</sub> | $\bar{X}$ | SD     | X <sub>1</sub>        | X <sub>2</sub> | X <sub>3</sub> | $\bar{X}$ | SD     |
| Xylitol                | 86.9760                      | 79.7280        | 87.3630        | 84.6890   | 4.3007 | 8.1700                | 7.3333         | 7.3133         | 7.6056    | 0.4889 |
| Maltitol               | 94.2080                      | 104.5280       | 98.1670        | 98.9677   | 5.2064 | 7.7833                | 7.4333         | 7.4867         | 7.5678    | 0.1886 |
| Soluble starch         | 89.0990                      | 94.6910        | 90.7840        | 91.5247   | 2.8686 | 7.9333                | 7.54           | 7.4733         | 7.6489    | 0.2486 |
| Rice meal              | 80.6330                      | 79.6170        | 79.5210        | 79.9237   | 0.6162 | 7.4667                | 7.5667         | 7.2733         | 7.4356    | 0.1491 |
| Dextrin                | 89.3580                      | 73.3810        | 86.6210        | 83.1200   | 8.5445 | 7.0800                | 7.3033         | 7.9867         | 7.4567    | 0.4724 |

Table S4. Effect of different maltitol concentrations on pentostatin production and biomass in *Actinomadura* sp. S-15.

| <b>Maltitol<br/>(g/L)</b> | <b>Pentostatin Production (g/L)</b> |                      |                      |                             |           | <b>Biomass (DCW) (mg/mL)</b> |                      |                      |                             |           |
|---------------------------|-------------------------------------|----------------------|----------------------|-----------------------------|-----------|------------------------------|----------------------|----------------------|-----------------------------|-----------|
|                           | <b>X<sub>1</sub></b>                | <b>X<sub>2</sub></b> | <b>X<sub>3</sub></b> | <b><math>\bar{X}</math></b> | <b>SD</b> | <b>X<sub>1</sub></b>         | <b>X<sub>2</sub></b> | <b>X<sub>3</sub></b> | <b><math>\bar{X}</math></b> | <b>SD</b> |
| 2                         | 72.1460                             | 75.8580              | 75.4240              | 74.4760                     | 2.0295    | 7.8233                       | 6.7967               | 6.9733               | 7.1978                      | 0.5489    |
| 4                         | 97.2120                             | 94.6480              | 96.7610              | 96.2070                     | 1.3688    | 7.1167                       | 8.1000               | 8.1533               | 7.7900                      | 0.5837    |
| 6                         | 78.0020                             | 80.2180              | 80.6030              | 79.6077                     | 1.4038    | 7.6333                       | 7.7367               | 8.0067               | 7.7922                      | 0.1928    |
| 8                         | 75.2660                             | 82.1285              | 77.8735              | 78.4227                     | 3.4641    | 8.0233                       | 7.9967               | 7.9667               | 7.9956                      | 0.0284    |
| 10                        | 69.7110                             | 76.4290              | 72.5000              | 72.8800                     | 3.3751    | 8.5400                       | 9.5800               | 8.5167               | 8.8789                      | 0.6073    |

Table S5 Effect of the initial pH of the fermentation medium on pentostatin production and biomass of *Actinomadura* sp. S-15

| pH  | Pentostatin Production (g/L) |                |                |           |        | Biomass (DCW) (mg/mL) |                |                |           |        |
|-----|------------------------------|----------------|----------------|-----------|--------|-----------------------|----------------|----------------|-----------|--------|
|     | X <sub>1</sub>               | X <sub>2</sub> | X <sub>3</sub> | $\bar{X}$ | SD     | X <sub>1</sub>        | X <sub>2</sub> | X <sub>3</sub> | $\bar{X}$ | SD     |
| 6.9 | 79.5770                      | 76.2030        | 75.7240        | 77.1680   | 2.1000 | 7.4200                | 6.6900         | 7.3500         | 7.1533    | 0.4028 |
| 7.2 | 89.2860                      | 86.9110        | 90.5880        | 88.9283   | 1.8644 | 7.2933                | 7.4400         | 7.4300         | 7.3878    | 0.0819 |
| 7.5 | 92.5470                      | 89.7570        | 92.6930        | 91.6657   | 1.6546 | 7.6367                | 7.2967         | 7.7200         | 7.5511    | 0.2243 |
| 7.8 | 95.1810                      | 93.5860        | 92.9830        | 93.9167   | 1.1357 | 7.4367                | 8.3533         | 7.8133         | 7.8678    | 0.4608 |
| 8.1 | 79.4940                      | 74.8470        | 80.0760        | 78.1390   | 2.8658 | 6.6600                | 6.8033         | 7.5000         | 6.9878    | 0.4494 |

Table S6 Effect of the seed age on pentostatin production and biomass of *Actinomadura* sp. S-15.

| Seed    | Pentostatin Production (g/L) |                |                |           |        | Biomass (DCW) (mg/mL) |                |                |           |        |
|---------|------------------------------|----------------|----------------|-----------|--------|-----------------------|----------------|----------------|-----------|--------|
| age (h) | X <sub>1</sub>               | X <sub>2</sub> | X <sub>3</sub> | $\bar{X}$ | SD     | X <sub>1</sub>        | X <sub>2</sub> | X <sub>3</sub> | $\bar{X}$ | SD     |
| 40      | 80.2280                      | 83.5210        | 83.4570        | 82.4020   | 1.8830 | 7.2367                | 6.8667         | 6.6967         | 6.9333    | 0.2761 |
| 48      | 86.2260                      | 88.7210        | 83.5090        | 86.1520   | 2.6068 | 7.2633                | 7.5000         | 7.2867         | 7.3500    | 0.1304 |
| 56      | 86.2350                      | 89.8450        | 88.3170        | 88.1323   | 1.8121 | 7.6033                | 7.8700         | 8.0433         | 7.8389    | 0.2216 |
| 64      | 74.6980                      | 75.3120        | 78.5160        | 76.1753   | 2.0502 | 7.1633                | 7.0800         | 7.6133         | 7.2856    | 0.2869 |
| 72      | 78.0860                      | 73.5560        | 72.3390        | 74.6603   | 3.0285 | 6.8733                | 6.9233         | 6.9733         | 6.9233    | 0.0500 |



Table S7 Effect of the culture time on pentostatin production and biomass of *Actinomadura* sp. S-15.

| <b>Culture</b>  | <b>Pentostatin Production (g/L)</b> |                      |                      |                             |           | <b>Biomass (DCW) (mg/mL)</b> |                      |                      |                             |           |
|-----------------|-------------------------------------|----------------------|----------------------|-----------------------------|-----------|------------------------------|----------------------|----------------------|-----------------------------|-----------|
| <b>time (d)</b> | <b>X<sub>1</sub></b>                | <b>X<sub>2</sub></b> | <b>X<sub>3</sub></b> | <b><math>\bar{X}</math></b> | <b>SD</b> | <b>X<sub>1</sub></b>         | <b>X<sub>2</sub></b> | <b>X<sub>3</sub></b> | <b><math>\bar{X}</math></b> | <b>SD</b> |
| 5               | 81.1920                             | 88.4690              | 87.1340              | 85.5983                     | 3.8739    | 6.7967                       | 6.7333               | 6.3600               | 6.6300                      | 0.2360    |
| 6               | 98.2050                             | 105.3960             | 108.0190             | 103.8733                    | 5.0811    | 6.9233                       | 6.9900               | 6.7100               | 6.8744                      | 0.1463    |
| 7               | 92.5470                             | 89.7570              | 92.6930              | 91.6657                     | 1.6546    | 6.4100                       | 6.0900               | 6.8933               | 6.4644                      | 0.4044    |
| 8               | 86.2270                             | 95.3350              | 94.2490              | 91.9370                     | 4.9747    | 6.7200                       | 6.6700               | 7.0833               | 6.8244                      | 0.2256    |
| 9               | 93.3860                             | 93.8380              | 95.9790              | 94.4010                     | 1.3852    | 7.2700                       | 6.8867               | 6.2867               | 6.8144                      | 0.4956    |
